# Supplementary material for: Multiplex profiling of peritoneal metastases from gastric adenocarcinoma identified novel targets and molecular subtypes that predict treatment response
Source: PubMed Central journal article supplement — Gut. 2019 Jun 6;69(1):18–31. doi: 10.1136/gutjnl-2018-318070 (PMC6943252; doi:10.1136/gutjnl-2018-318070), 2019-06-06
Supplement: gutjnl-2018-318070supp002.pdf [file gutjnl-2018-318070supp002.pdf]

**Supplemental Table 2. Patients' treatment history before ascites collection**

| Sample   | The last day of chemotherapy before ascites collection | Drugs history used before ascites collection |          |        |            |             |             |                |        |
|----------|--------------------------------------------------------|----------------------------------------------|----------|--------|------------|-------------|-------------|----------------|--------|
|          |                                                        | 5-fluorouracil                               | Platinum | taxane | Irinotecan | Trastuzumab | Ramucirumab | PD-1 inhibitor | Others |
| IP-004   | within 3m                                              | Yes                                          | Yes      | No     | No         | No          | No          | No             | No     |
| IP-007   | Within 3m-12m                                          | Yes                                          | Yes      | Yes    | No         | No          | No          | No             | No     |
| IP-008   | Within 3m-12m                                          | Yes                                          | Yes      | Yes    | Yes        | No          | No          | No             | No     |
| IP-009-2 | No treatment                                           | No                                           | No       | No     | No         | No          | No          | No             | No     |
| IP-010-1 | within 3m                                              | Yes                                          | Yes      | No     | No         | No          | No          | No             | No     |
| IP-013   | No treatment                                           | No                                           | No       | No     | No         | No          | No          | No             | No     |
| IP-020   | within 3m                                              | Yes                                          | Yes      | Yes    | Yes        | No          | Yes         | No             | No     |
| IP-022   | Within 3m-12m                                          | Yes                                          | Yes      | Yes    | No         | No          | No          | No             | No     |
| IP-023   | more than 3years                                       | Yes                                          | Yes      | No     | No         | No          | No          | No             | No     |
| IP-024-1 | within 3m                                              | Yes                                          | Yes      | No     | Yes        | No          | No          | No             | No     |
| IP-026-1 | within 3m                                              | Yes                                          | Yes      | No     | No         | No          | No          | No             | No     |
| IP-029   | within 3m                                              | Yes                                          | Yes      | No     | No         | No          | No          | No             | No     |
| IP-031   | within 3m                                              | Yes                                          | Yes      | Yes    | No         | No          | Yes         | No             | Yes    |
| IP-032-1 | within 3m                                              | Yes                                          | Yes      | Yes    | No         | No          | Yes         | No             | No     |
| IP-033-2 | within 3m                                              | Yes                                          | Yes      | Yes    | No         | No          | No          | No             | No     |
| IP-036   | Within 3m-12m                                          | Yes                                          | Yes      | Yes    | No         | No          | No          | No             | No     |
| IP-038   | within 3m                                              | Yes                                          | Yes      | Yes    | Yes        | No          | Yes         | No             | Yes    |
| IP-039-1 | within 3m                                              | Yes                                          | Yes      | No     | Yes        | Yes         | No          | No             | Yes    |
| IP-040   | within 3m                                              | Yes                                          | Yes      | No     | No         | No          | Yes         | No             | Yes    |
| IP-042   | within 3m                                              | Yes                                          | Yes      | No     | Yes        | No          | No          | No             | No     |
| IP-043   | Within 3m-12m                                          | Yes                                          | Yes      | No     | No         | No          | No          | No             | Yes    |
| IP-045   | Within 3m-12m                                          | Yes                                          | Yes      | No     | No         | No          | No          | No             | No     |
| IP-046   | within 3m                                              | Yes                                          | Yes      | No     | No         | No          | No          | No             | No     |
| IP-051   | No treatment                                           | No                                           | No       | No     | No         | No          | No          | No             | No     |
| IP-052-1 | within 3m                                              | Yes                                          | Yes      | Yes    | Yes        | No          | Yes         | No             | No     |
| IP-054   | within 3m                                              | Yes                                          | Yes      | No     | No         | No          | No          | No             | No     |
| IP-056   | within 3m                                              | Yes                                          | Yes      | Yes    | Yes        | No          | Yes         | No             | No     |
| IP-057   | within 3m                                              | Yes                                          | Yes      | No     | No         | No          | No          | No             | No     |
| IP-058-2 | within 3m                                              | Yes                                          | Yes      | No     | Yes        | Yes         | No          | No             | No     |

**Supplemental Table 2. Patients' treatment history before ascites collection**

|          |               |     |     |     |     |    |     |     |     |
|----------|---------------|-----|-----|-----|-----|----|-----|-----|-----|
| IP-062   | within 3m     | Yes | Yes | No  | Yes | No | Yes | No  | No  |
| IP-064-1 | No treatment  | No  | No  | No  | No  | No | No  | No  | No  |
| IP-067-1 | within 3m     | Yes | Yes | No  | No  | No | No  | No  | No  |
| IP-067-2 | within 3m     | Yes | Yes | Yes | No  | No | Yes | No  | No  |
| IP-068   | within 3m     | Yes | Yes | No  | No  | No | No  | No  | No  |
| IP-070   | within 3m     | Yes | Yes | Yes | No  | No | Yes | No  | No  |
| IP-073   | Within 3m-12m | Yes | Yes | No  | No  | No | No  | No  | No  |
| IP-104   | within 3m     | Yes | Yes | Yes | No  | No | Yes | No  | Yes |
| IP-107-2 | within 3m     | Yes | Yes | No  | No  | No | No  | No  | No  |
| IP-109   | within 3m     | Yes | Yes | No  | Yes | No | No  | Yes | No  |
| IP-116   | within 3m     | Yes | Yes | Yes | No  | No | Yes | Yes | No  |
| IP-118-1 | within 3m     | Yes | Yes | Yes | No  | No | No  | No  | No  |
| IP-123-1 | within 3m     | No  | No  | No  | No  | No | No  | Yes | Yes |
| IP-124-1 | within 3m     | Yes | Yes | Yes | Yes | No | Yes | No  | No  |

---
